# Supplementary material
Source: PubMed Central journal article supplement (PMC3422488)

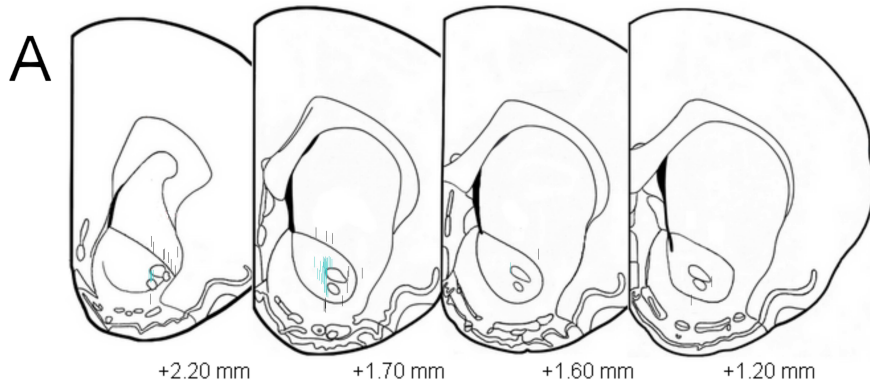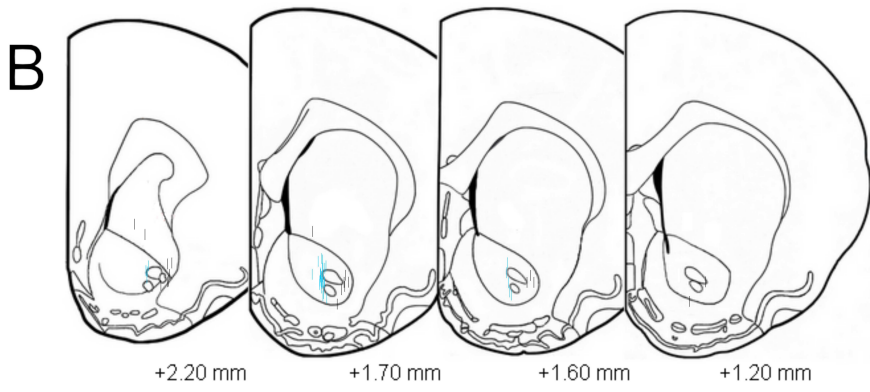

Supplement: npp201274x1.pdf [file npp201274x1.pdf]
